# Supplementary material
Source: MDPI journal article supplement (https://www.mdpi.com/2073-4395/14/5/975)
Supplement: s1 [file s1]

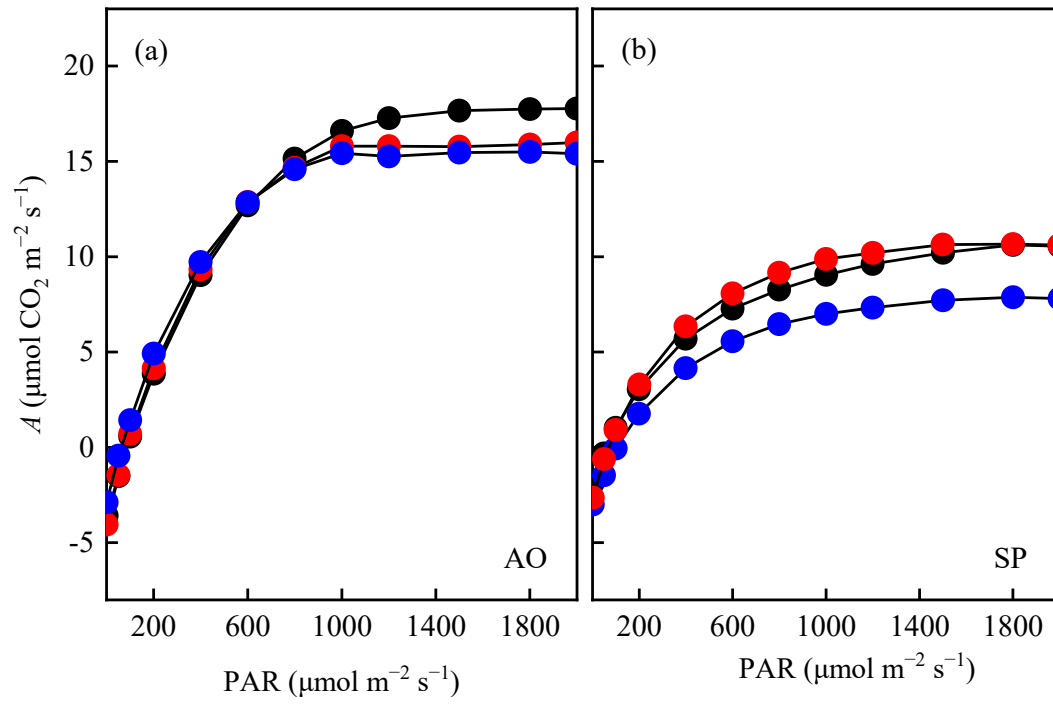

**Figure S1** Photosynthetic light-response curves of *A. ordosica* (AO, left-side panels) and *S. psammophila* (SP, right-side panels). Different colours represent different individuals of *A. ordosica* and *S. psammophila*.

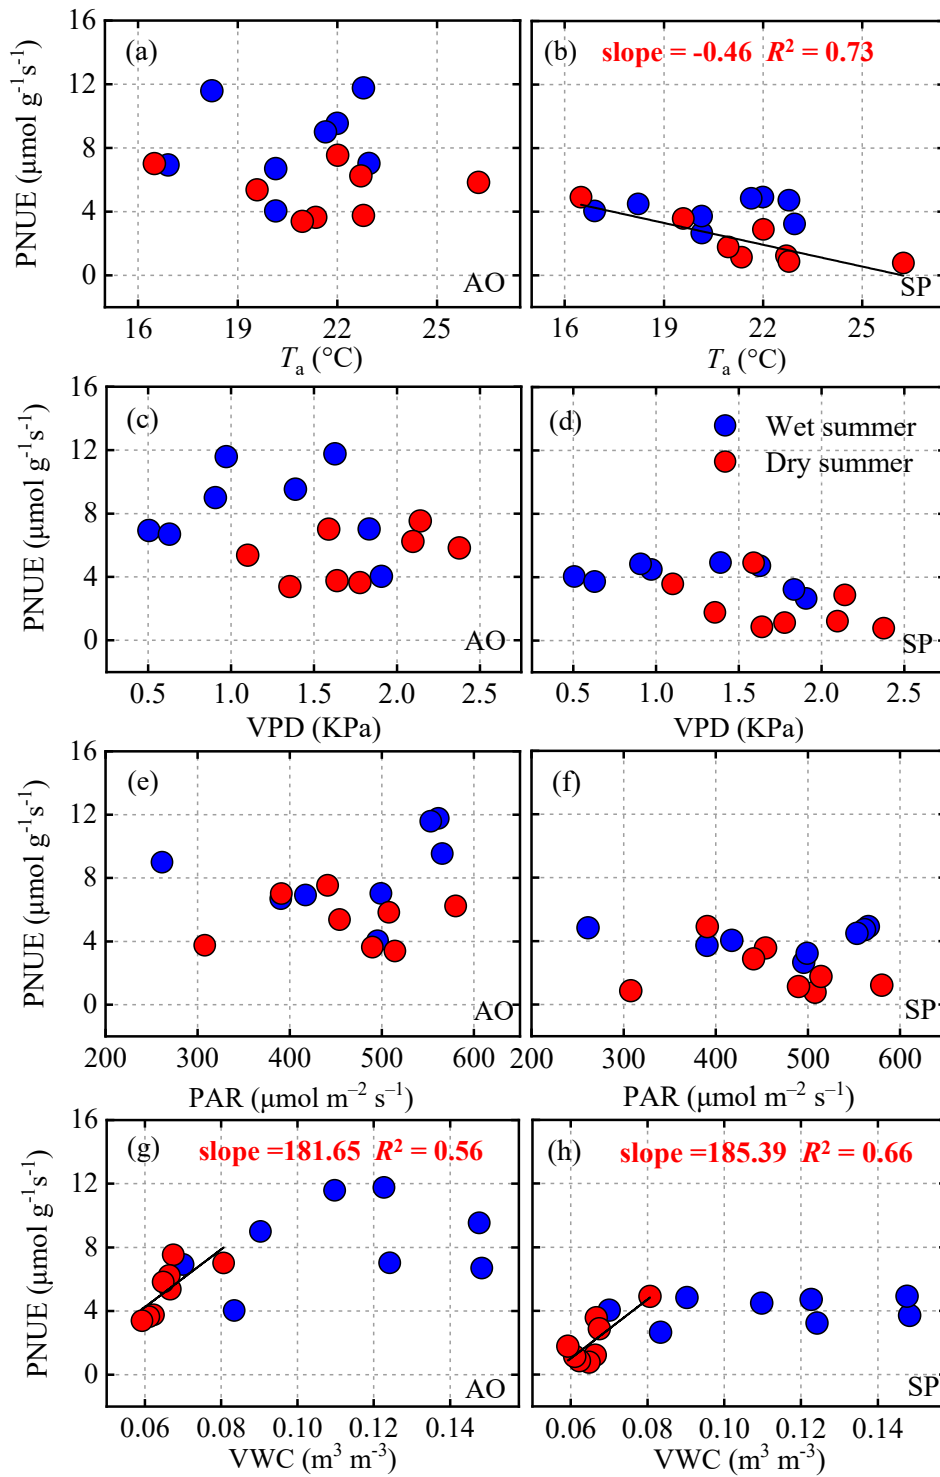

**Figure S2** Pairwise relationships between photosynthetic N use efficiency (PNUE) and air temperature ( $T_a$ , a and b), water vapor pressure deficit (VPD, c and d), photosynthetically active radiation (PAR, e and f), volumetric soil water content at a 30-cm depth (VWC, g and h) associated with *A. ordosica* (AO, left-side panels) and *S. psammophila* (SP, right-side panels), respectively.

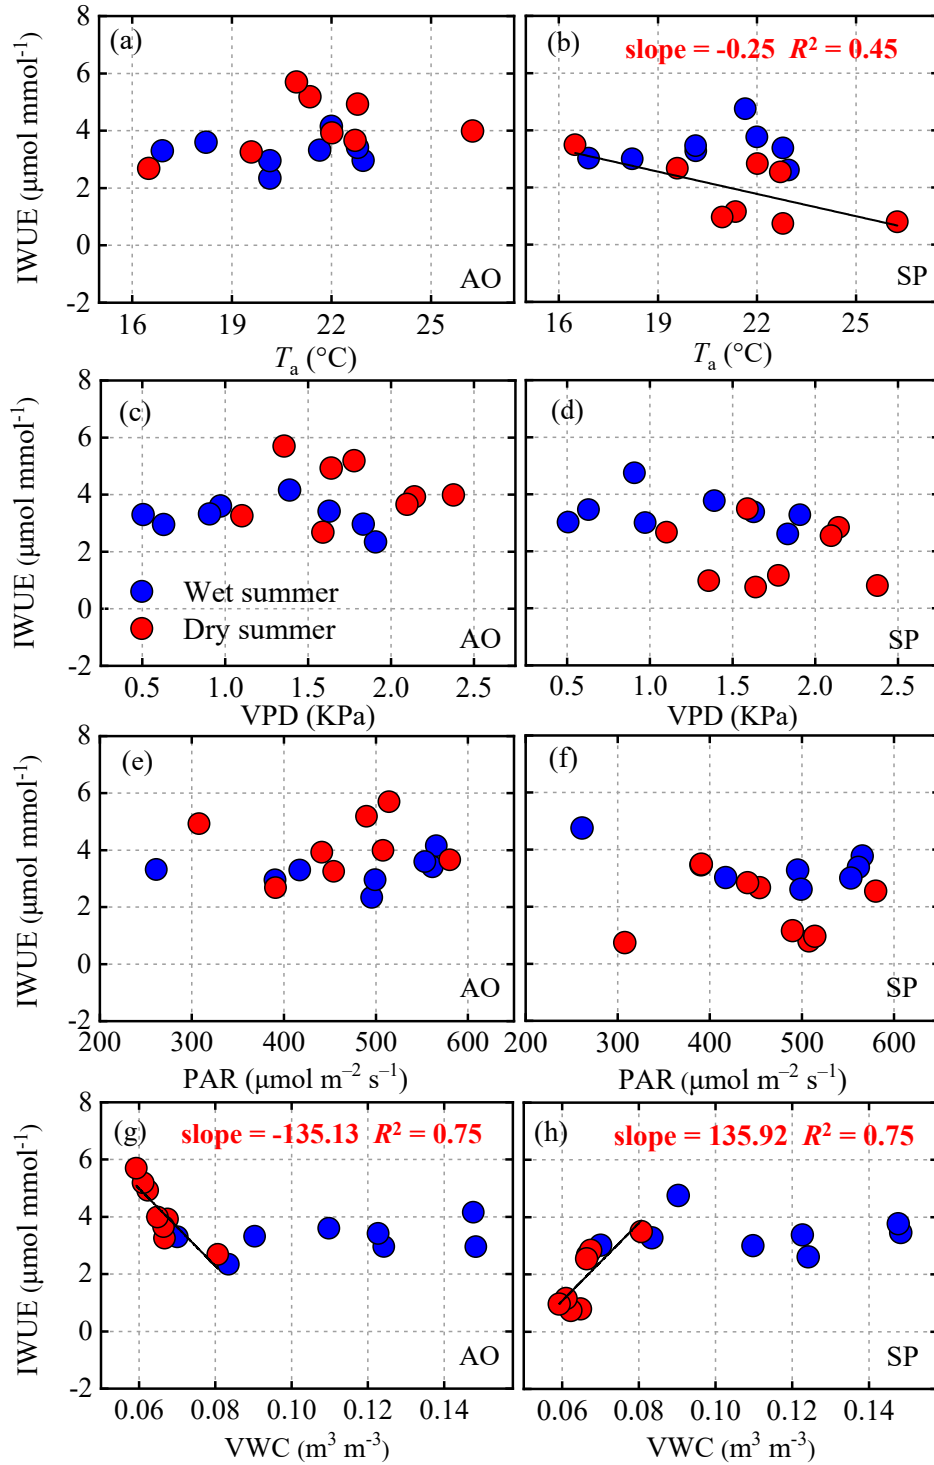

**Figure S3** Pairwise relationships between instantaneous water use efficiency (IWUE) and air temperature ( $T_a$ , a and b), water vapor pressure deficit (VPD, c and d), photosynthetically active radiation (PAR, e and f), volumetric soil water content at a 30-cm depth (VWC, g and h) associated with *A. ordosica* (AO, left-side panels) and *S. psammophila* (SP, right-side panels), respectively.

**Table S1.** Correlation coefficients for pairwise relationships between resource use efficiency (RUE, with respect to water and N use), and leaf mass and N content per leaf area (LMA and  $N_{\text{area}}$ ). Statistically significant correlations ( $P < 0.05$ ) are displayed in bold.

| Species                   | RUE      | Season | LMA          | $N_{\text{area}}$ |
|---------------------------|----------|--------|--------------|-------------------|
| <i>Artemisia ordosica</i> | Water    | Wet    | -0.33        | -0.06             |
|                           |          | Dry    | <b>-0.73</b> | <b>-0.77</b>      |
|                           | Nitrogen | Wet    | 0.08         | -0.11             |
|                           |          | Dry    | 0.59         | <b>0.73</b>       |
| <i>Salix psammophila</i>  | Water    | Wet    | 0.06         | <b>0.78</b>       |
|                           |          | Dry    | 0.36         | 0.37              |
|                           | Nitrogen | Wet    | -0.55        | 0.62              |
|                           |          | Dry    | <b>0.77</b>  | <b>0.66</b>       |
